# Supplementary material for: Rapid draft sequencing and real-time nanopore sequencing in a hospital outbreak of Salmonella
Source: PubMed Central journal article supplement (PMC4702336; doi:10.1186/s13059-015-0677-2), 2015-05-30
Supplement: 13059_2015_677_MOESM1_ESM.pdf [file 13059_2015_677_MOESM1_ESM.pdf]

| Date    | 12/06/2014 | 20/06/2014 | 04/07/2014 | Surveillance                              |
|---------|------------|------------|------------|-------------------------------------------|
| Plate   | 27         | 28         | 30         | -                                         |
| Format  | 1x75       | 250x250    | 300x300    | 100x100                                   |
| Samples |            |            | 907828     |                                           |
|         | 112797     | 112797     |            | 20909_H14242081901-1                      |
|         |            | 906014     |            |                                           |
|         | 907378     | 907378     |            | 18554_H14238030801-1                      |
|         | 907452     | 907452     |            | 21777_H14246029605-2/21781_H14246030005-2 |
|         |            | 907462     |            | 18556_H14238031001-1/21785_H14246030505-2 |
|         | 907474     | 907474     |            |                                           |
|         | 907479     | 907479     |            | 21778_H14246029705-2/21782_H14246030105-2 |
|         |            | 907513     |            |                                           |
|         | 907525     | 907525     |            | 21786_H14246030605-2/21779_H14246029805-2 |
|         | 907555     | 907555     |            | 21115_H14242077501-2                      |
|         | 907568     | 907568     |            | 21117_H14242078101-2                      |
|         | 907603     | 907603     |            | 21767_H14242077701-2                      |
|         | 907608     | 907608     |            | 21116_H14242077601-2                      |
|         |            | 907638     |            | 18555_H14238030901-1                      |
|         | 907648     | 907648     |            | 21114_H14242077401-2                      |
|         |            | 907659     |            | 21783_H14246030205-2                      |
|         | 907678     | 907678     |            | 21113_H14242077301-2                      |
|         | 907724     | 907724     |            | 21770_H14244069001-2                      |
|         | 907757     | 907757     |            | 20925_H14244069101-1                      |
|         |            | 907774     |            |                                           |
|         | 907789     | 907789     |            | 20926_H14244069201-1                      |
|         | 907812     | 907812     |            | 20927_H14244069301-1                      |
|         |            | 907826     |            |                                           |
|         |            | 907926     | 907926     | 21845_H14252045205-2                      |
|         |            | 907928     |            |                                           |
|         |            | 907946     | 907946     | 21844_H14252045105-2                      |

907985  
908004  
908108  
908127

907985  
908004  
908108  
908127  
908151  
908175  
908346  
908390  
908397  
908430  
908445  
908735  
908736  
908767

H142480277  
H142580393  
H142580394

21816\_H14248028305-2  
21843\_H14252045005-2

21846\_H14252045305-2  
21815\_H14248028205-2  
21807\_H14248027405-2  
21810\_H14248027705-2  
21809\_H14248027605-2  
21808\_H14248027505-2

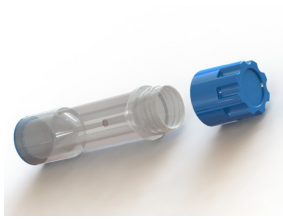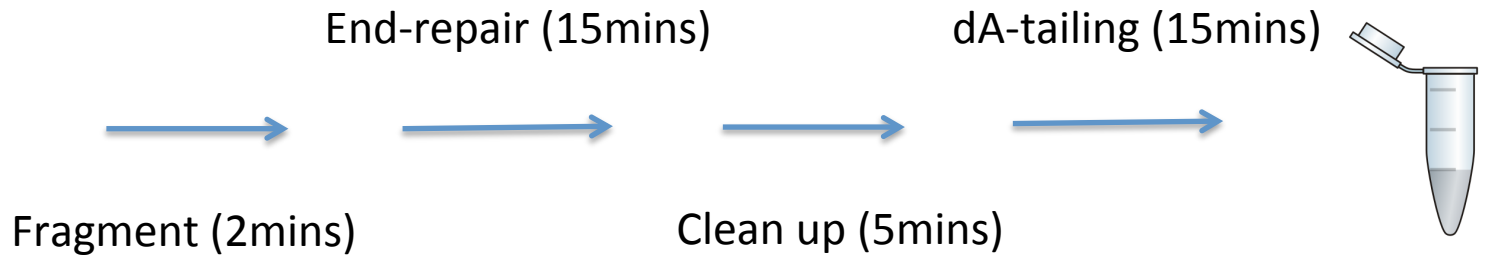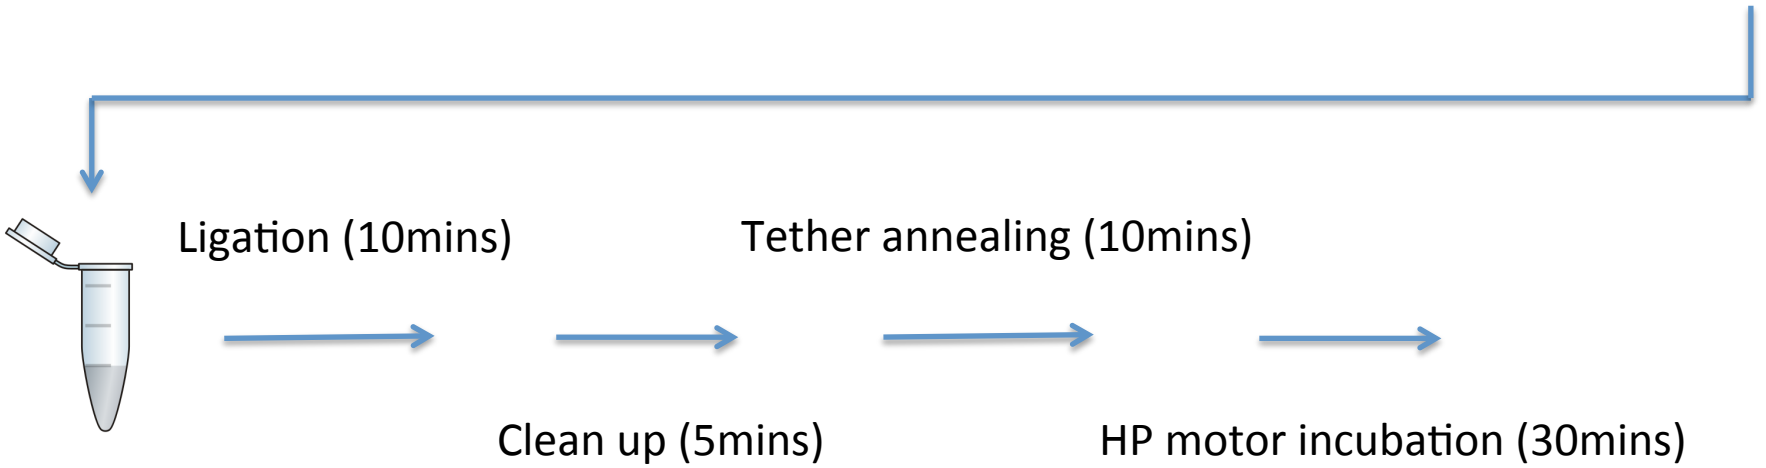

Total: 92 minutes
